# Supplementary material for: Brow and Masticatory Muscle Activity Senses Subjective Hedonic Experiences during Food Consumption
Source: MDPI journal article supplement (doi:10.3390/nu13124216), 2021-11-24
Supplement: s1 [file s1]

**Table S1.** Mean (with *SD*) subjective ratings.

| Stimulus             | Measure      |              |              |              |
|----------------------|--------------|--------------|--------------|--------------|
|                      | Liking       | Wanting      | Valence      | Arousal      |
| Vanillin             | 6.5<br>(1.3) | 6.1<br>(1.6) | 6.6<br>(1.2) | 5.8<br>(0.9) |
| Maltol               | 6.4<br>(1.2) | 6.3<br>(1.2) | 6.5<br>(1.0) | 5.6<br>(1.3) |
| Ethyl butyrate       | 6.5<br>(1.4) | 6.2<br>(1.9) | 6.5<br>(1.3) | 5.9<br>(1.1) |
| Phenethyl alcohol    | 4.4<br>(2.0) | 3.9<br>(1.9) | 4.3<br>(2.0) | 5.0<br>(1.8) |
| Acetoin              | 4.8<br>(1.8) | 4.6<br>(1.7) | 4.8<br>(1.7) | 5.1<br>(1.5) |
| 2,5-dimethylpyrazine | 3.6<br>(1.5) | 3.2<br>(1.5) | 3.4<br>(1.5) | 5.1<br>(1.9) |
| Isovaleric acid      | 3.9<br>(1.6) | 3.4<br>(1.7) | 3.7<br>(1.5) | 4.9<br>(1.8) |
| (E)-2-Nonenal        | 2.8<br>(1.6) | 2.5<br>(1.5) | 2.6<br>(1.6) | 5.5<br>(2.0) |
| Indole               | 3.7<br>(1.7) | 3.2<br>(1.7) | 3.8<br>(1.7) | 5.0<br>(2.0) |

**Table S2.** Mean (with *SD*) physiological activity.

| Stimulus             | Measure       |               |               |               |               |               |               |
|----------------------|---------------|---------------|---------------|---------------|---------------|---------------|---------------|
|                      | Corrugator    | Zygomatic     | Masseter      | Suprahyoid    | SCR           | HR            | Nose          |
| Vanillin             | −0.4<br>(0.5) | −0.1<br>(0.4) | 0.0<br>(0.6)  | 0.1<br>(0.6)  | −0.1<br>(0.6) | 0.1<br>(0.7)  | 0.0<br>(0.6)  |
| Maltol               | −0.1<br>(0.7) | 0.1<br>(0.5)  | 0.1<br>(0.5)  | 0.1<br>(0.6)  | 0.0<br>(0.7)  | 0.1<br>(0.6)  | 0.3<br>(0.8)  |
| Ethyl butyrate       | 0.0<br>(0.6)  | 0.2<br>(0.8)  | 0.4<br>(0.8)  | 0.3<br>(0.5)  | 0.1<br>(0.6)  | −0.2<br>(0.8) | −0.2<br>(0.6) |
| Phenethyl alcohol    | −0.1<br>(0.6) | 0.0<br>(0.6)  | −0.1<br>(0.6) | 0.1<br>(0.5)  | 0.0<br>(0.5)  | 0.1<br>(0.7)  | −0.2<br>(0.8) |
| Acetoin              | 0.0<br>(0.6)  | 0.0<br>(0.5)  | −0.1<br>(0.6) | 0.0<br>(0.6)  | 0.0<br>(0.7)  | 0.1<br>(0.7)  | 0.2<br>(0.7)  |
| 2,5-dimethylpyrazine | 0.2<br>(0.6)  | 0.0<br>(0.7)  | 0.1<br>(0.7)  | −0.1<br>(0.6) | −0.1<br>(0.6) | 0.0<br>(0.6)  | −0.2<br>(0.7) |
| Isovaleric acid      | −0.1<br>(0.7) | −0.1<br>(0.7) | −0.2<br>(0.6) | −0.1<br>(0.7) | −0.1<br>(0.7) | −0.2<br>(0.8) | 0.1<br>(0.5)  |
| (E)-2-Nonenal        | 0.2<br>(0.7)  | −0.2<br>(0.8) | −0.2<br>(0.8) | −0.1<br>(0.7) | 0.3<br>(0.8)  | 0.1<br>(0.7)  | 0.1<br>(0.8)  |
| Indole               | 0.2<br>(0.8)  | 0.0<br>(0.7)  | −0.1<br>(0.7) | −0.1<br>(0.9) | 0.0<br>(0.6)  | −0.1<br>(0.6) | 0.1<br>(0.8)  |

All physiological data were standardized within each individual. Corrugator = Corrugator supercilii; Zygomatic = zygomatic major; SCR = skin conductance response; HR = heart rate; Nose = Nose-tip temperature.
